# Supplementary material for: Reanalysis of the Rituximab in ANCA-Associated Vasculitis trial identifies granulocyte subsets as a novel early marker of successful treatment
Source: Springer Nature journal article supplement (doi:10.1186/s13075-015-0778-z), 2015-09-18

(A)

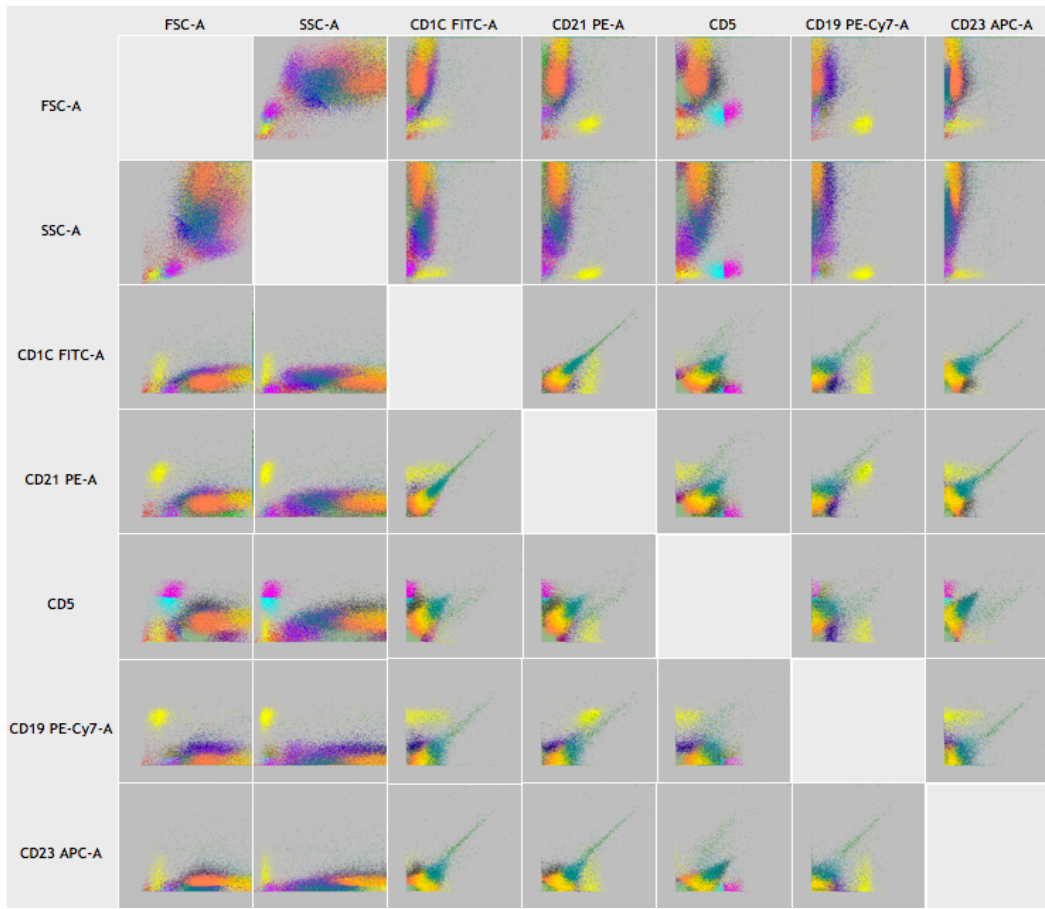

(B)

Key: 1=negative, 2=low, 3=positive, 4=high

| op. | Color        | FSC-A | SSC-A | CD11c ... | CD21 ... | CD5 | CD19 ... | CD23... | Proportion % |
|-----|--------------|-------|-------|-----------|----------|-----|----------|---------|--------------|
|     | Red          | 2     | 1     | 1         | 1        | 1   | 1        | 1       | 2.29         |
|     | Yellow       | 1     | 1     | 1         | 2        | 1   | 2        | 1       | 1.56         |
|     | Green        | 4     | 4     | 2         | 2        | 2   | 2        | 2       | 0.31         |
|     | Blue         | 2     | 3     | 1         | 1        | 1   | 1        | 1       | 8.11         |
|     | Orange       | 3     | 3     | 1         | 1        | 1   | 1        | 1       | 8.28         |
|     | Purple       | 3     | 2     | 1         | 1        | 1   | 1        | 1       | 4.43         |
|     | Olive        | 2     | 1     | 1         | 1        | 2   | 1        | 1       | 0.38         |
|     | Cyan         | 1     | 1     | 1         | 1        | 2   | 1        | 1       | 1.09         |
|     | Magenta      | 2     | 1     | 1         | 1        | 2   | 1        | 1       | 1.02         |
| 0   | Light Green  | 3     | 4     | 1         | 1        | 1   | 1        | 1       | 7.62         |
| 1   | Dark Blue    | 3     | 4     | 1         | 1        | 1   | 1        | 1       | 5.0          |
| 2   | Light Red    | 4     | 3     | 1         | 1        | 1   | 1        | 1       | 5.86         |
| 3   | Dark Purple  | 3     | 4     | 1         | 1        | 1   | 1        | 1       | 8.17         |
| 4   | Light Yellow | 3     | 4     | 1         | 1        | 1   | 1        | 1       | 8.9          |
| 5   | Light Green  | 2     | 3     | 1         | 1        | 1   | 1        | 1       | 8.07         |
| 6   | Dark Grey    | 3     | 4     | 1         | 1        | 2   | 1        | 1       | 3.23         |
| 7   | Dark Teal    | 3     | 3     | 1         | 1        | 1   | 1        | 1       | 6.47         |
| 8   | Purple       | 3     | 3     | 1         | 1        | 1   | 1        | 1       | 3.09         |
| 9   | Light Orange | 3     | 4     | 1         | 1        | 1   | 1        | 1       | 8.2          |
| 0   | Yellow       | 4     | 4     | 1         | 1        | 1   | 1        | 1       | 5.8          |
| 1   | Dark Teal    | 4     | 4     | 2         | 2        | 2   | 1        | 1       | 2.14         |

(C)

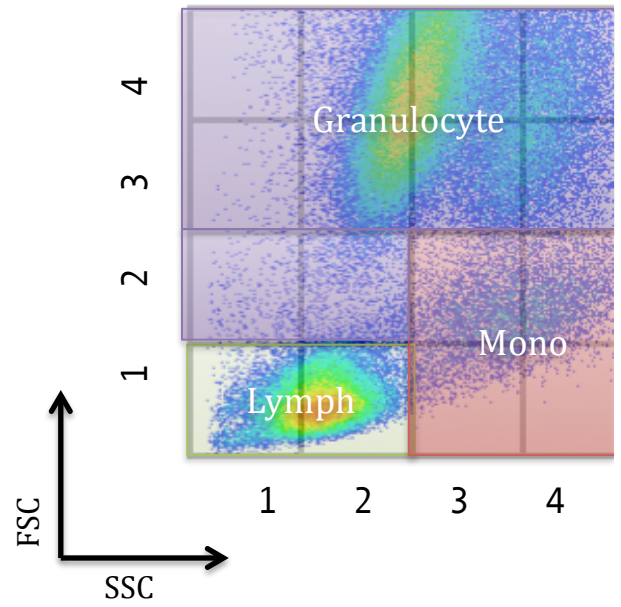

Supplement: MOESM1 [file 9783986]
