# Supplementary material for: Reanalysis of the Rituximab in ANCA-Associated Vasculitis trial identifies granulocyte subsets as a novel early marker of successful treatment
Source: Springer Nature journal article supplement (doi:10.1186/s13075-015-0778-z), 2015-09-18

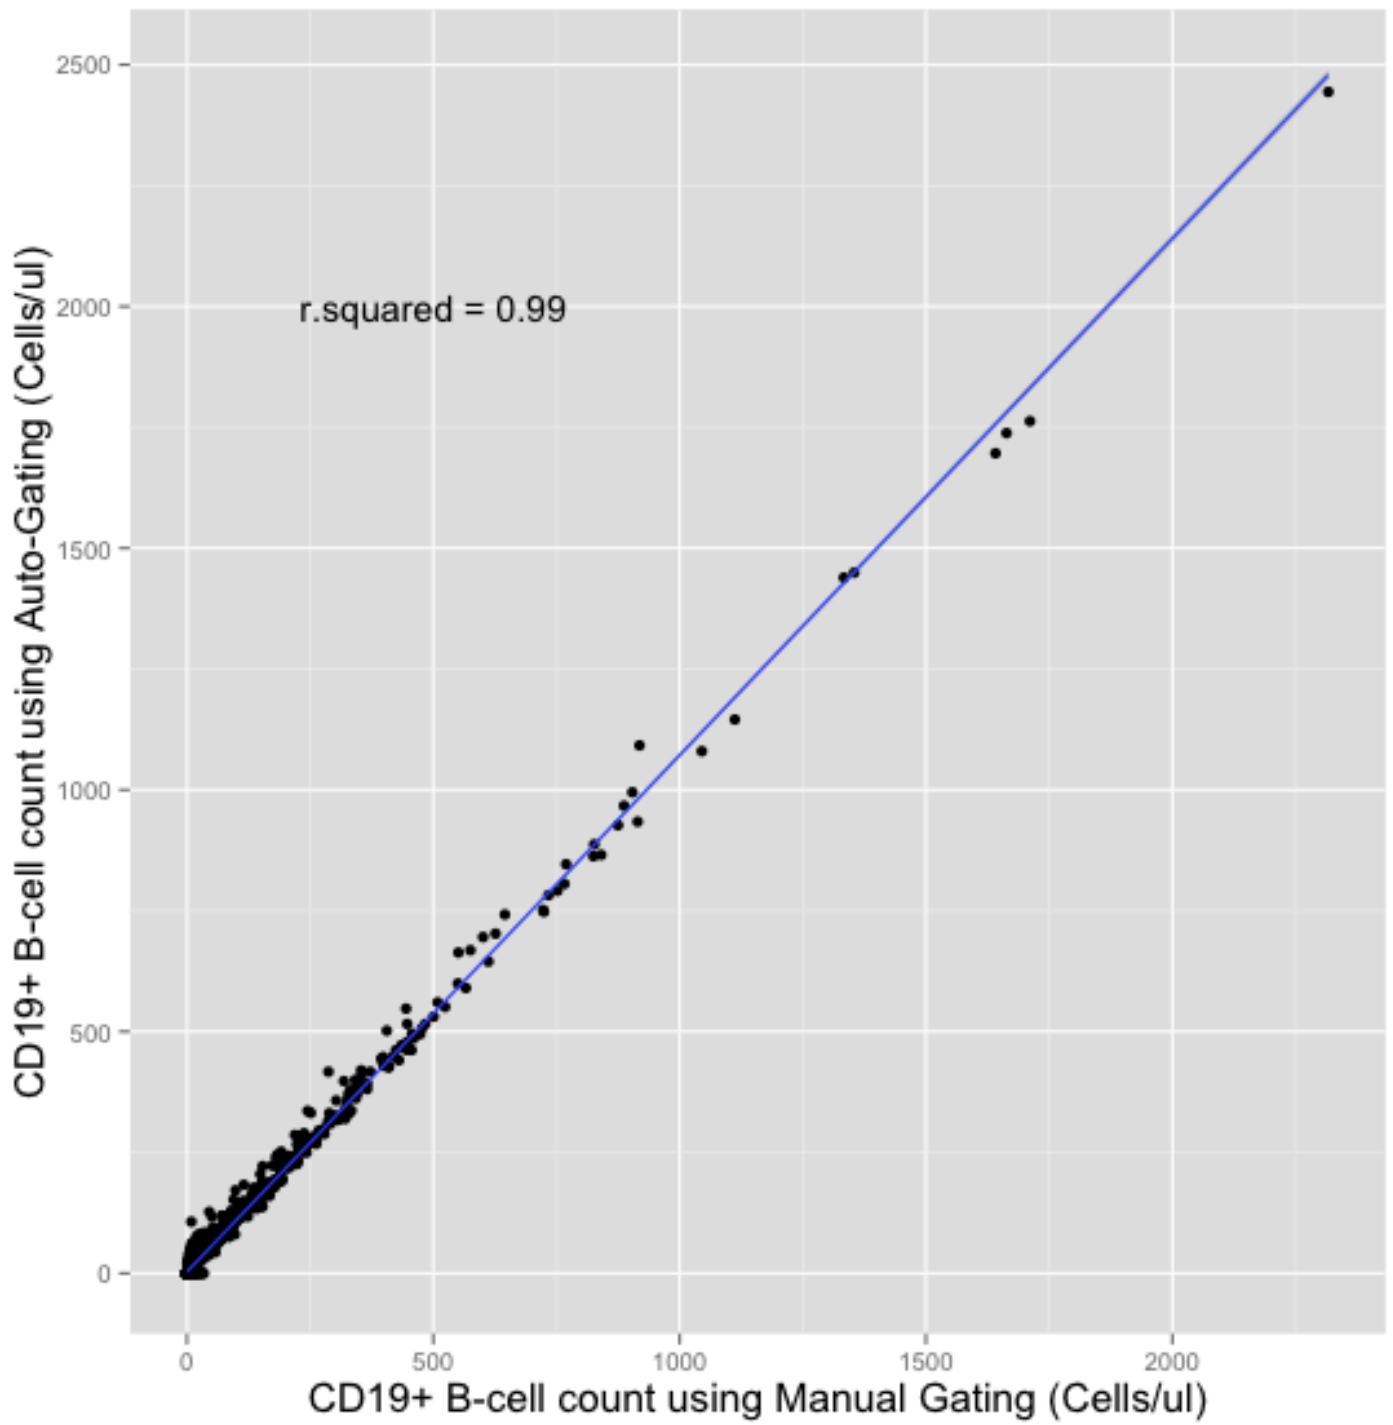

Supplement: MOESM2 [file 9783986]
